# Supplementary material for: Jacob‐induced transcriptional inactivation of CREB promotes Aβ‐induced synapse loss in Alzheimer's disease
Source: PubMed Central journal article supplement — EMBO J. 2023 Jan 3;42(4):e112453. doi: 10.15252/embj.2022112453 (PMC9929644; doi:10.15252/embj.2022112453), 2023-01-03
Supplement: EMBJ-42-e112453-s003.pdf [file EMBJ-42-e112453-s003.pdf]

## Table of Contents

|                         |   |
|-------------------------|---|
| Appendix Figure S1..... | 2 |
| Appendix Figure S2..... | 4 |

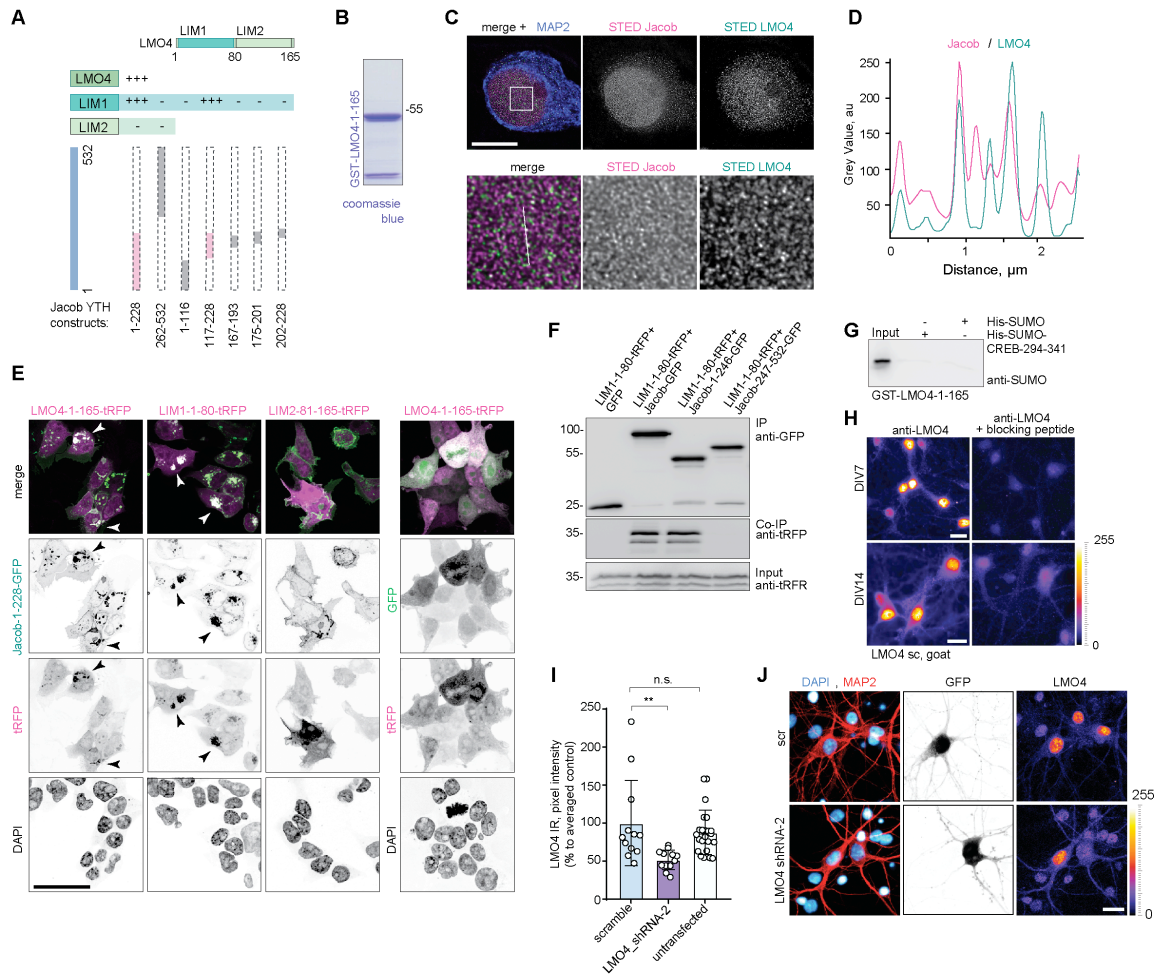

**Appendix Figure S1. Confirmation of the LMO4-Jacob interaction, LMO4 antibody specificity and quantification of LMO4 knockdown efficiency, confirmation of Jacob-PP1 interaction, protein purity and loading controls for pull down experiments and studies on the interaction and network activity depending upon Jacob S180 phosphorylation.**

**(A)** Jacob-117-228 interacts with the LIM1 domain of LMO4 in Y2H. (+++) indicates a strong interaction while (-) indicates no interaction. Evaluation was based on the number of colonies growing in triple drop-out media.

**(B)** Coomassie blue stained gel showing purity of GST-LMO4 used in the pull-down experiments.

**(C, D)** Super-resolution STED imaging revealed association of Jacob with LMO4 in the nucleus **(C)**. DIV16 primary hippocampal neurons stained with antibodies against MAP2, LMO4, pan-Jacob. Upper panel - scale bar:10  $\mu\text{m}$ , lower panel (inserts 5  $\mu\text{m}$  x5  $\mu\text{m}$  – denoted by the white square). **(D)** Line profiles indicate relative intensities for deconvolved STED channels along a 2.5  $\mu\text{m}$  line.

**(E)** Jacob-1-228-GFP co-recruits the LIM1 (1-80), but not LIM2 (81-165) domain of LMO4. Confocal images of HEK293T cells co-transfected either with Jacob-1-228-GFP or GFP together with LMO4 constructs. Arrows indicate co-recruitment. Scale bar: 40  $\mu\text{m}$ .

**(F)** LIM1-1-80-tRFP co-immunoprecipitate with Jacob-1-246-GFP, but not Jacob-247-532-GFP from HEK293T cell extracts.

**(G)** Pull-down experiments revealed no interaction between His-SUMO-CREB-294-341 with GST-LMO4.

**(H)** A goat LMO4 antibody was used to stain LMO4 in hippocampal neurons (DIV 7 and DIV 14) in the presence or absence of the blocking peptide. Scale bar: 15  $\mu\text{m}$ .

**(I)** Nuclear LMO4 staining intensity was downregulated in neurons expressing shRNA targeting LMO4 mRNA compared to scrambled-transfected (scr shRNA) or non-transfected cells. Data represented as mean  $\pm$  SEM. n=12-23 nuclei. \*\* $p < 0,021$  by Kruskal-Wallis test followed by Dunn's multiple comparison test.

**(J)** Representative, confocal images of hippocampal neurons transfected with shRNA targeting LMO4 or scrambled control. Reduction of nuclear LMO4 level was confirmed in immunocytochemistry with the goat anti-LMO4 antibody. Scale bar:10  $\mu\text{m}$ .

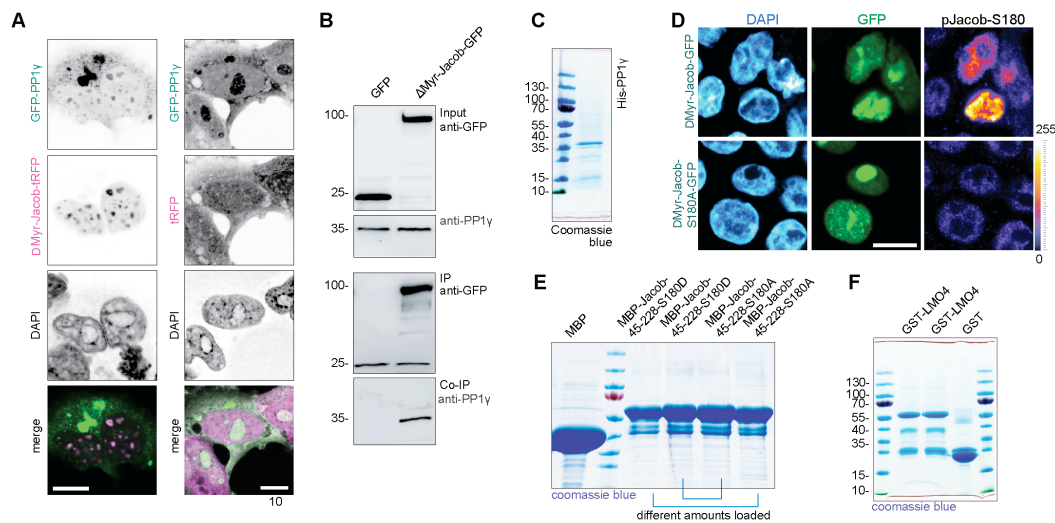

## Appendix Figure S2. Jacob interacts with PP1 $\gamma$ .

**(A)** Confocal images of HEK293T cells overexpressing GFP-PP1 $\gamma$  together with either  $\Delta$ Myr-Jacob-tagRFP or tRFP control revealed nuclear co-clustering of both proteins. Scale bar: 20  $\mu$ m.

**(B)**  $\Delta$ Myr-Jacob-GFP but not GFP co-immunoprecipitate with endogenous PP1 $\gamma$  from HEK293T cells extracts.

**(C)** Coomassie blue stained gel showing purity of commercially available His-PP1 $\gamma$ .

**(D)** Nuclear Jacob ( $\Delta$ Myr-Jacob-GFP), but not nuclear phosphodeficient mutant ( $\Delta$ Myr-Jacob-S180A-GFP) expressed in HEK293T cells is phosphorylated. Confocal images of HEK293T cells overexpressing Jacob and immunostained with anti-pS180Jacob antibodies. Scale bar: 10  $\mu$ m.

**(E)** Image of gels stained with coomassie blue showing the purity of bacterially produced Jacob mutants used for pull-down assays.

**(F)** Images of gels stained with coomassie blue showing inputs for bacterially produced GST-LMO4 coupled to beads used for pull-down assay with Jacob and PP1 $\gamma$ .
